# Supplementary material for: Influence of Cover Screw Loosening on Peri-implant Infection and Marginal Bone Loss: A Retrospective Observational Study
Source: Research Square preprint supplement (doi:10.21203/rs.3.rs-7666737/v1), 2025-12-22
Supplement: Supplementary file 1 [file 0d3661793f495b09f077b638.docx]

| Table 1: Demographics, Implant related parameters, and MBL in the two groups | | | | | |
| --- | --- | --- | --- | --- | --- |
|  | |  | Control  group | Infection  group | p-value |
| Gender | | Female | 60 (61.9%) | 26 (26.8%) | <0.0001* |
| Male | 37 (38.1%) | 71 (73.2%) |
| Age | |  | 46.9 (7.16) | 48.9 (8.1) |  |
| Implant location | | Upper incisors | 5 (5.2%) | 5 (5.2%) |  |
| Upper premolars | 18 (18.6%) | 6 (6.2%) |
| Upper molars | 23 (23.7%) | 13 (13.4%) |
| Lower incisors | 5 (5.2%) | 4 (4.1%) |
| Lower premolar | 18 (18.6%) | 23 (23.7%) |
| Lower molars | 28 (28.9%) | 46 (47.4%) |
|  |  |  |  |
| Upper jaw | 46 (47.4%) | 24 (24.7%) | 0.001* |
| Lower jaw | 51 (52.6%) | 73 (75.3%) |
|  |  |  |  |
| Incisors | 10 (10.3%) | 9 (9.3%) |  |
| Premolars | 36 (37.1%) | 29 (29.9%) |
| Molars | 51 (52.6%) | 59 (60.8%) |
| Implant platform | Matching | | 58 (59.8%) | 58 (59.8%) |  |
| Switching | | 39 (40.2%) | 39 (40.2%) |
| Implant diameter | | | 4.3 (0.5) | 4.5 (0.53) |  |
| Implant length | | | 10.1 (1.31) | 10.6 (1.72) |  |
| Time to presentation | | | NA | 4 (2-30) | # |
| Types of lesions at presentation | | Gum boil | - | 43 (44.3%) |  |
| Gum polyp | - | 18 (18.6%) |
| Gum ulcer | - | 1 (1.03%) |
| Irregular mass | - | 35 (36.1%) |
| MBL | | <1.5 mm | 97 (100%) | 31 (32%) | <0.0001* |
| ≥1.5 mm | 0 | 66 (68%) |
| MBL after 1 year of loading | | <1.5 mm | 84 (86.6%) | 7 (7.2%) | <0.0001* |
| ≥1.5 mm | 13 (13.4%) | 90 (92.8%) |
| MBL (in mm) | | at presentation | 0.378 (0.274) | 1.97 (0.903) | <0.0001** |
| after 1 year | 0.829 (0.503) | 2.98 (1.115) | <0.0001** |
| Difference | 0.451 (0.301) | 1.013 (0.46) | <0.0001** |
| Data are presented as mean (SD) for numerical variables or frequency (%) for categorical variables. *p-value of chi-square test, **p-value of independent T-test, # median(range) | | | | | |
