# Supplementary material for: Influence of Cover Screw Loosening on Peri-implant Infection and Marginal Bone Loss: A Retrospective Observational Study
Source: Research Square preprint supplement (doi:10.21203/rs.3.rs-7666737/v1), 2025-12-22
Supplement: Supplementary file 2 [file 8596734b2613b8b1179baba1.docx]

| Table 2: Correlation between age, implant-related parameters and MBL | | | | |
| --- | --- | --- | --- | --- |
|  | **Age** | **Implant Diameter** | **Implant Length** | **Time-to-presentation** |
| MBL at Presentation | 0.112 | 0.141* | 0.092 | 0.807** |
| MBL Final | 0.127 | 0.123 | 0.148* | 0.763** |
| MBL Difference | 0.125 | 0.048 | 0.227** | 0.452** |
| Data are presented as correlation coefficient (*r*), * & ** indicate a p-value of <0.01 and 0.001, respectively of Pearson Correlation. | | | | |
