# Supplementary material for: Influence of Cover Screw Loosening on Peri-implant Infection and Marginal Bone Loss: A Retrospective Observational Study
Source: Research Square preprint supplement (doi:10.21203/rs.3.rs-7666737/v1), 2025-12-22
Supplement: Supplementary file 3 [file 8bb65ec43edd2e0544286f11.docx]

| Table 3: Predictor factors of the MBL after one year of implant loading among studied implants | | | | | | |
| --- | --- | --- | --- | --- | --- | --- |
| Variable | | **SLR**a | | **MLR**b | | |
|  | | b (95% CI) | P value | Adjusted b (95% CI) | T statistics | P value |
| Gender | Male | 0.69 (0.308-1.073) | <0.0001 | - | - | - |
| Age | | 0.023 (-0.002-0.048) | 0.077 | - | - | - |
| Presence of Infection | Yes | 2.15 (1.91-2.40) | <0.001 | 0.258 (0.094-0.422) | 3.098 | 0.002 |
| Implant location | Lower molar | 0.467 (0.069-0.865) | 0.022 | - | - | - |
|  | | | | | | |
|  | Molars | 0.198 (-0.196-0.593) | 0.323 | - | - | - |
|  | | | | | | |
|  | Lower jaw | 0.476(0.073-0.878) | 0.021 | - | - | - |
|  | | | | | | |
| Implant diameter | | 0.321 (-0.048-0.689) | 0.087 | - | - | - |
| Implant length | | 0.132 (0.006-0.258) | 0.04 | 0.045 (0.011-0.079) | 2.592 | 0.010 |
| Time to presentation | | 0.108 (0.083-0.133) | <0.0001 | - | - | - |
| MBL at presentation | | 1.279 (1.226-1.331) | <0.0001 | 1.177 (1.098-1.255) | 29.561 | <0.0001 |
| a Simple linear regression, b Multiple linear regression  R2= 0.965 The model fits well, assumptions are met no multicollinearity or interaction | | | | | | |
